# Supplementary material
Source: Springer Nature journal article supplement (https://www.springermedizin.de/resource/supplementary/13063_2013_1387_MOESM2_ESM.pdf/9619918)

# Predicted and Actual Participant Accrual

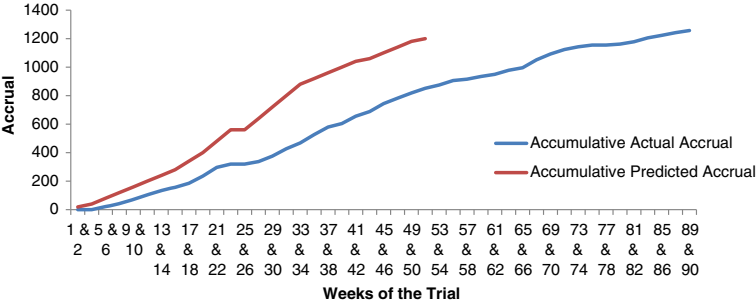

Supplement: MOESM2 [file 9619918]
